# Supplementary material for: Identification of dyes on fabric exposed to lake and ocean water using near-infrared excitation Raman spectroscopy
Source: Royal Society of Chemistry journal article supplement (doi:10.1039/d5ay01973g), 2026-01-01
Supplement: d5ay01973g1.pdf [file d5ay01973g1.pdf]

# Identification of Dyes on Fabric Exposed to Lake and Ocean Waters Using Near-Infrared Excitation Raman Spectroscopy

Claire Sasaki<sup>1</sup>, Shannon Bober<sup>1</sup>, Aidan P. Holman<sup>1</sup> and Dmitry Kurouski<sup>\*1</sup>

1. Department of Biochemistry and Biophysics, Texas A&M University, College Station, Texas 77843, United States

## Supporting Information

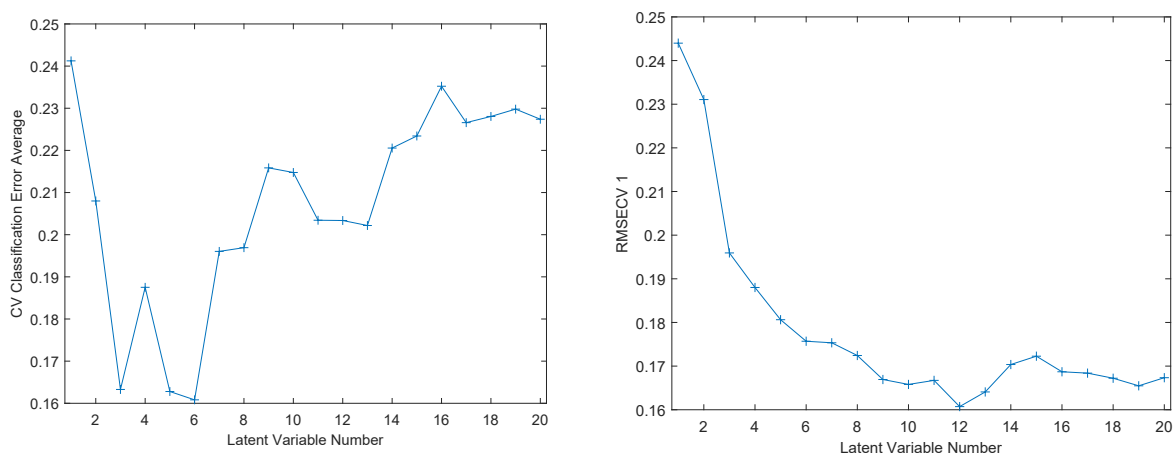

Figure S1. Cross-Validation (CV) Error (left) and Root Mean Square Error of Cross-Validation (RMSECV) Plots (right) of PLS-DA model used to predict faring stages of magenta-colored cotton exposed to ocean water (Figure 3, A). Based on these plots, 4 latent variables (LVs) were chosen.

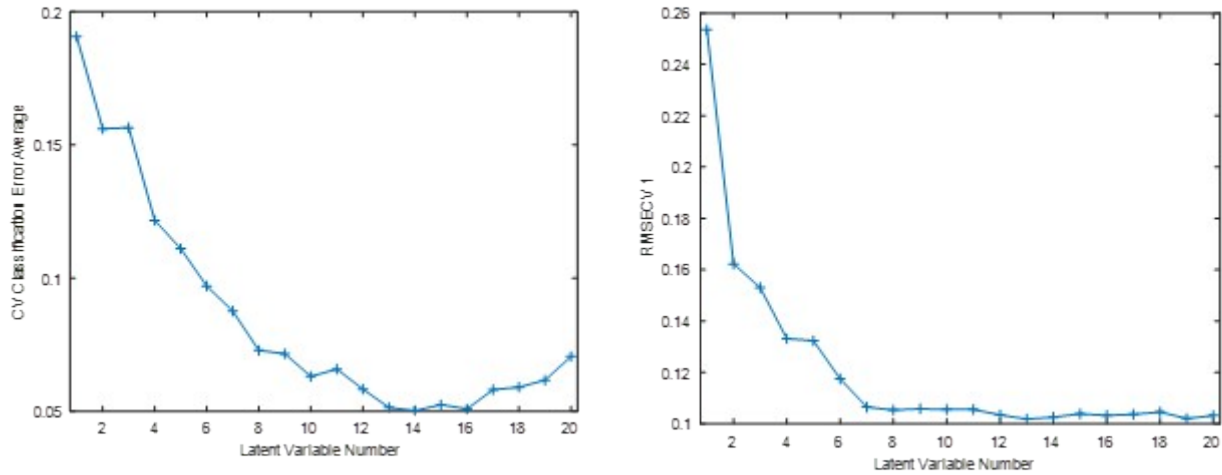

Figure S2. Cross-Validation (CV) Error (left) and Root Mean Square Error of Cross-Validation (RMSECV) Plots (right) of PLS-DA model used to predict faring stages of magenta-colored cotton exposed to lake water (Figure 3, B). Based on these plots, 2 latent variables (LVs) were chosen.

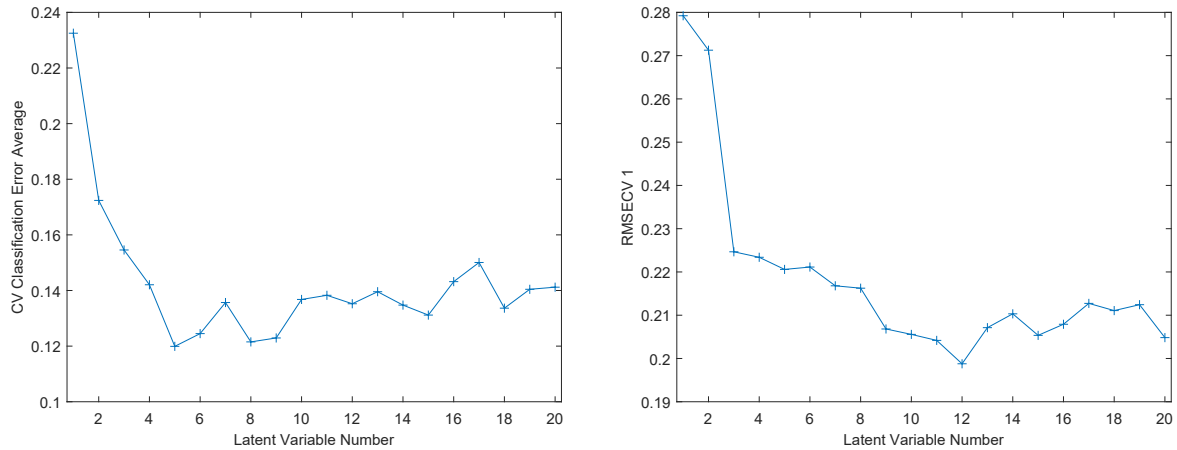

Figure S3. Cross-Validation (CV) Error (left) and Root Mean Square Error of Cross-Validation (RMSECV) Plots (right) of PLS-DA model used to predict faring stages of blue-colored cotton exposed to ocean water (Figure 5, A). Based on these plots, 5 latent variables (LVs) were chosen.

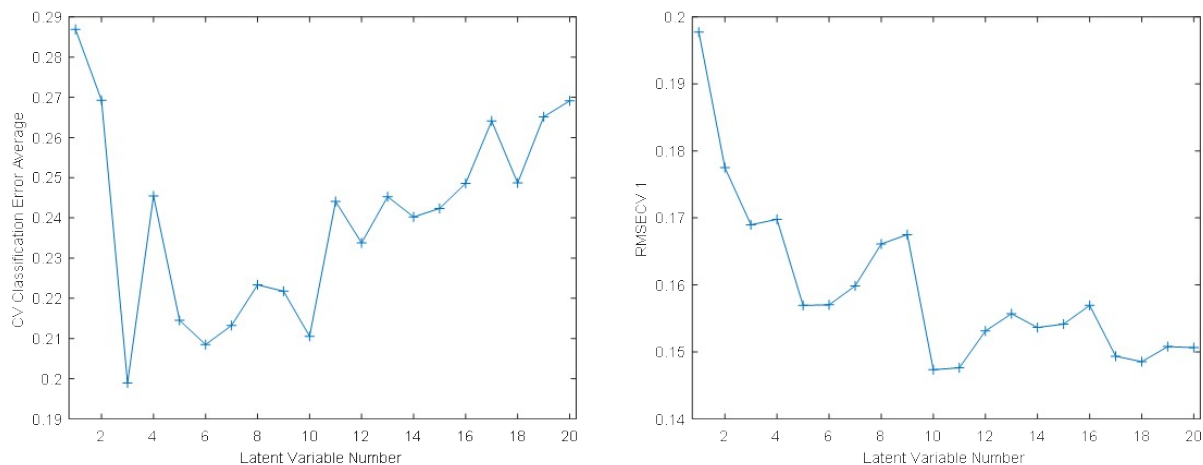

Figure S4. Cross-Validation (CV) Error (left) and Root Mean Square Error of Cross-Validation (RMSECV) Plots (right) of PLS-DA model used to predict faring stages of blue-colored cotton exposed to ocean lake (Figure 5, B). Based on these plots, 5 latent variables (LVs) were chosen.

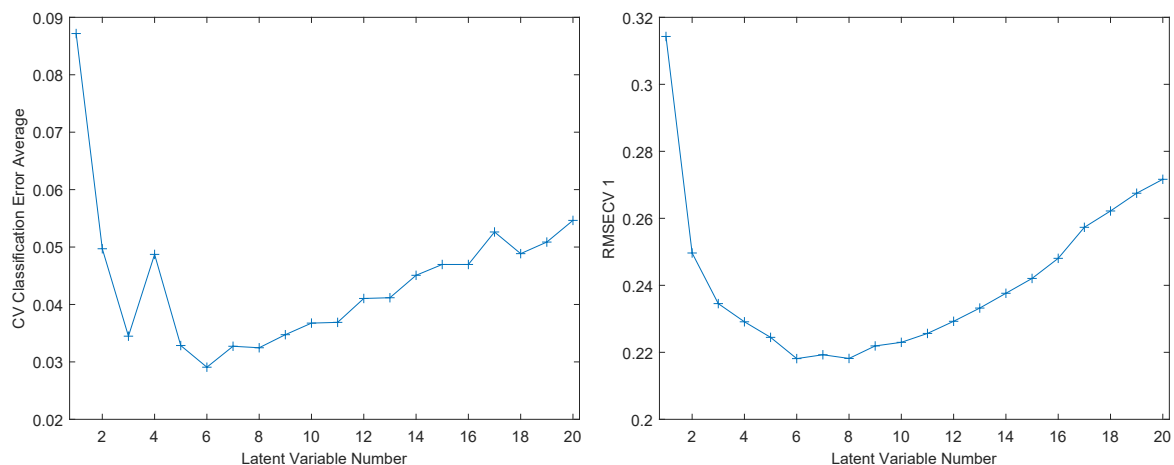

Figure S5. Cross-Validation (CV) Error (left) and Root Mean Square Error of Cross-Validation (RMSECV) Plots (right) of PLS-DA model used to predict dyes on colored cotton exposed to ocean and lake water (Table 2). Based on these plots, 6 latent variables (LVs) were chosen.

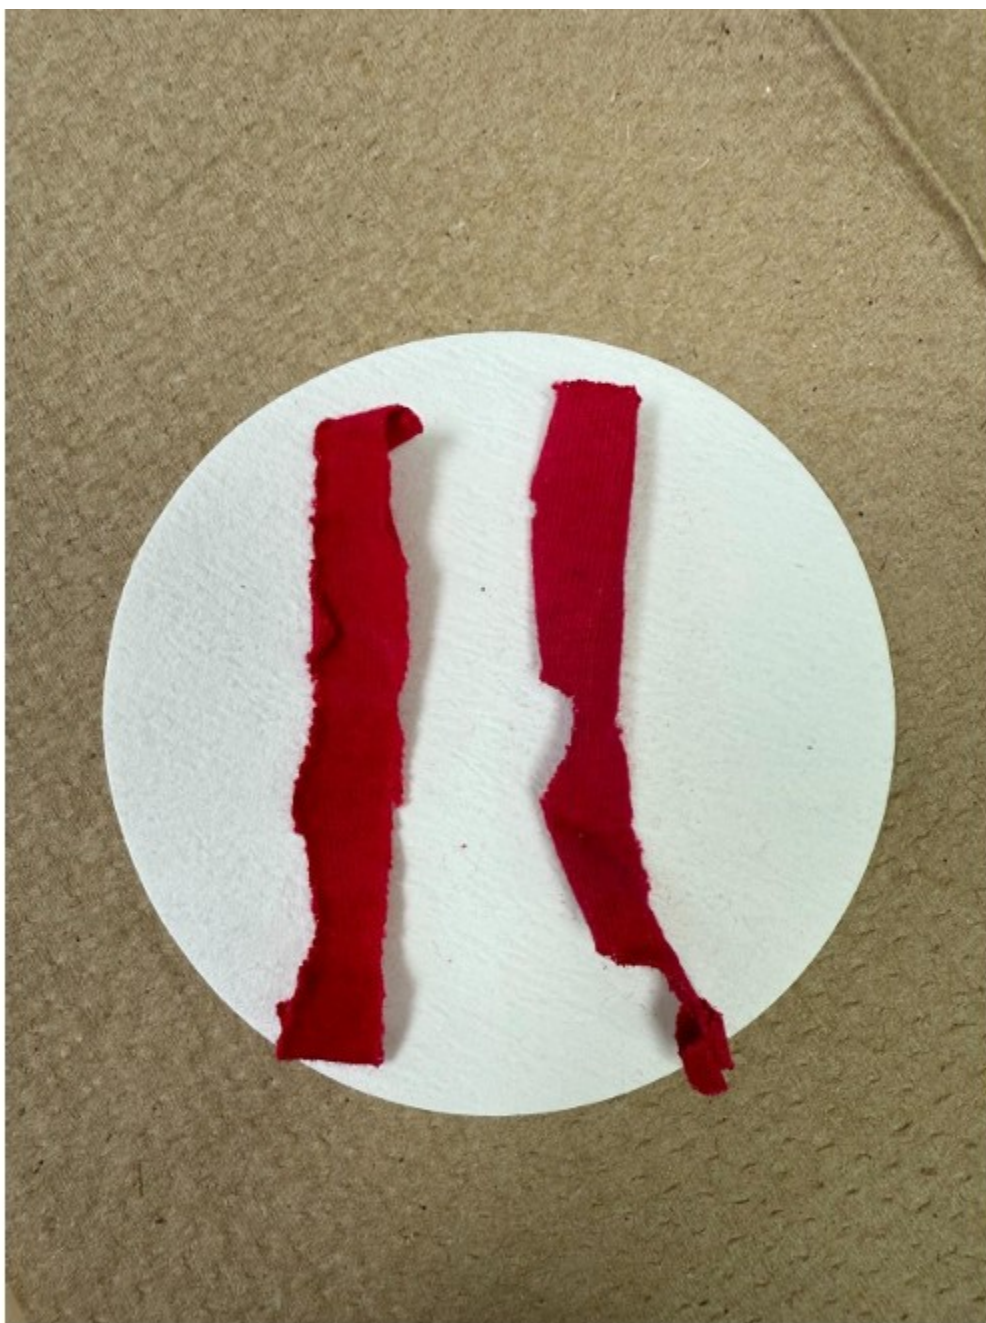

Figure S6. Magenta-colored fabric at week 0 (left) and week 14 (right) after exposure to ocean water.

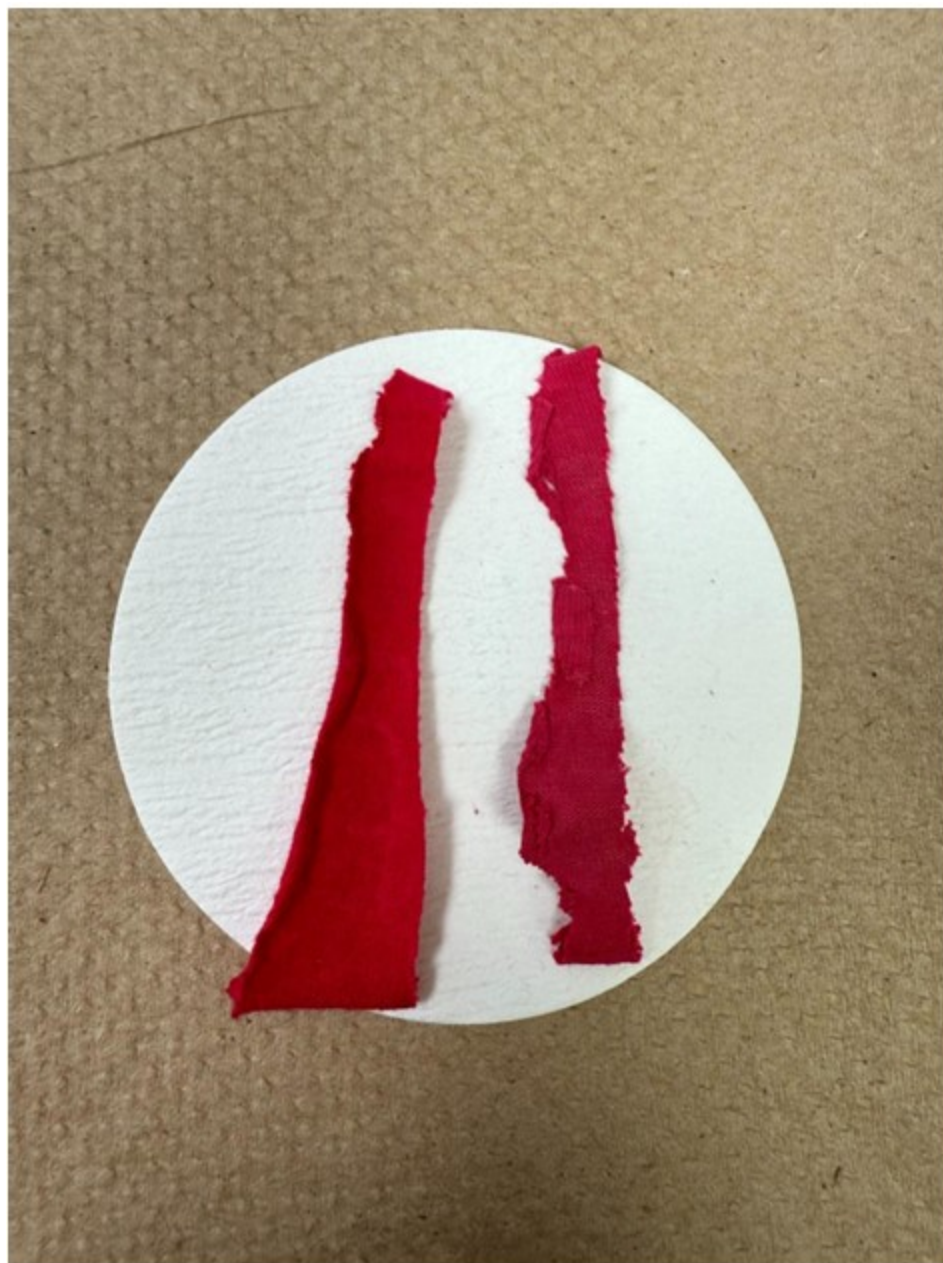

Figure S7. Magenta-colored fabric at week 0 (left) and week 14 (right) after exposure to lake water.

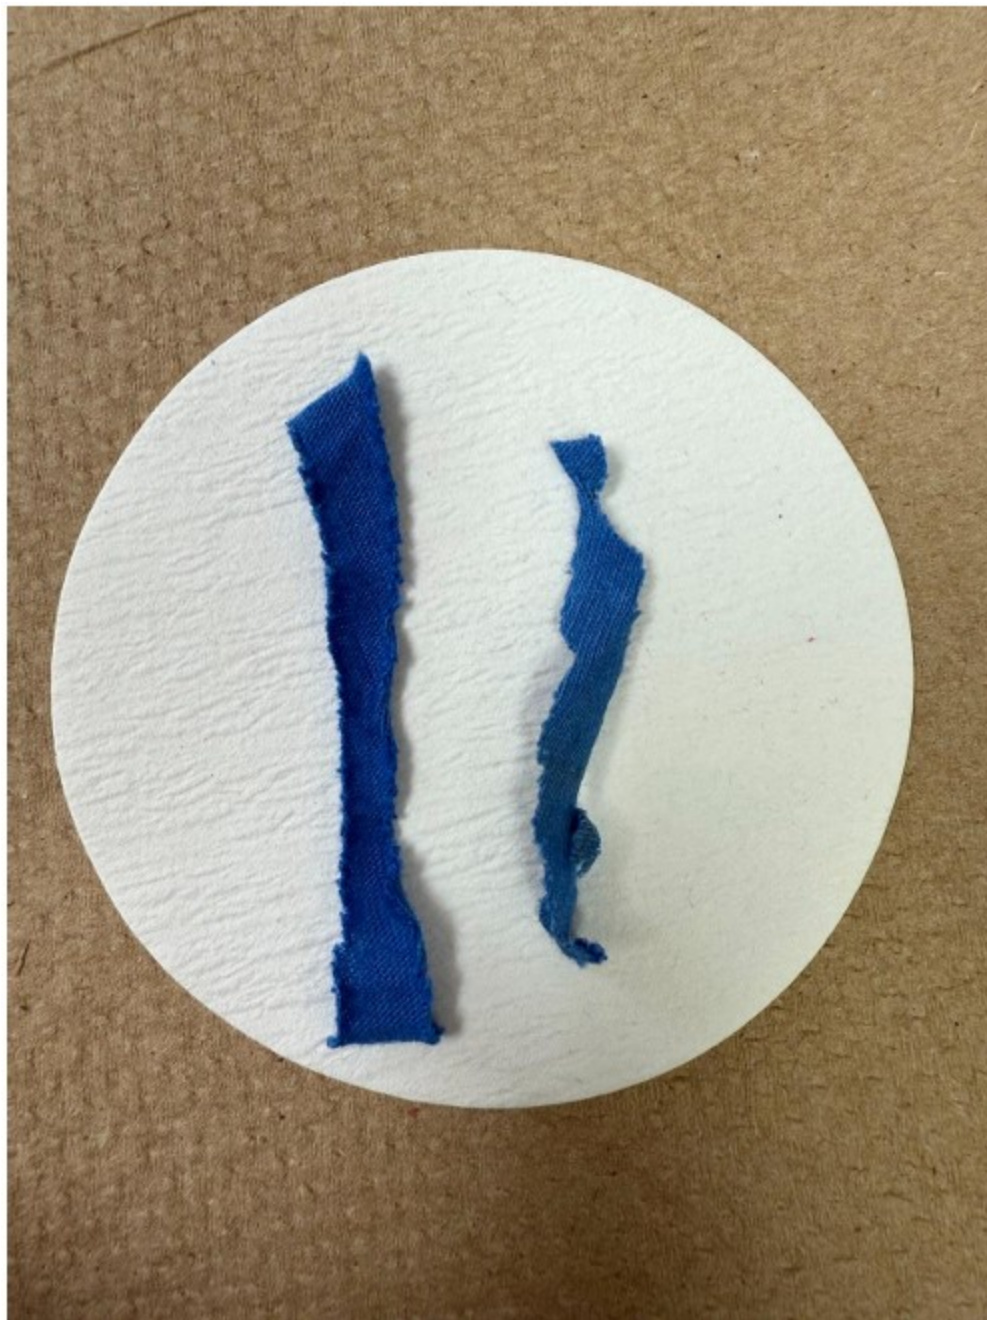

Figure S8. Blue-colored fabric at week 0 (left) and week 14 (right) after exposure to ocean water.

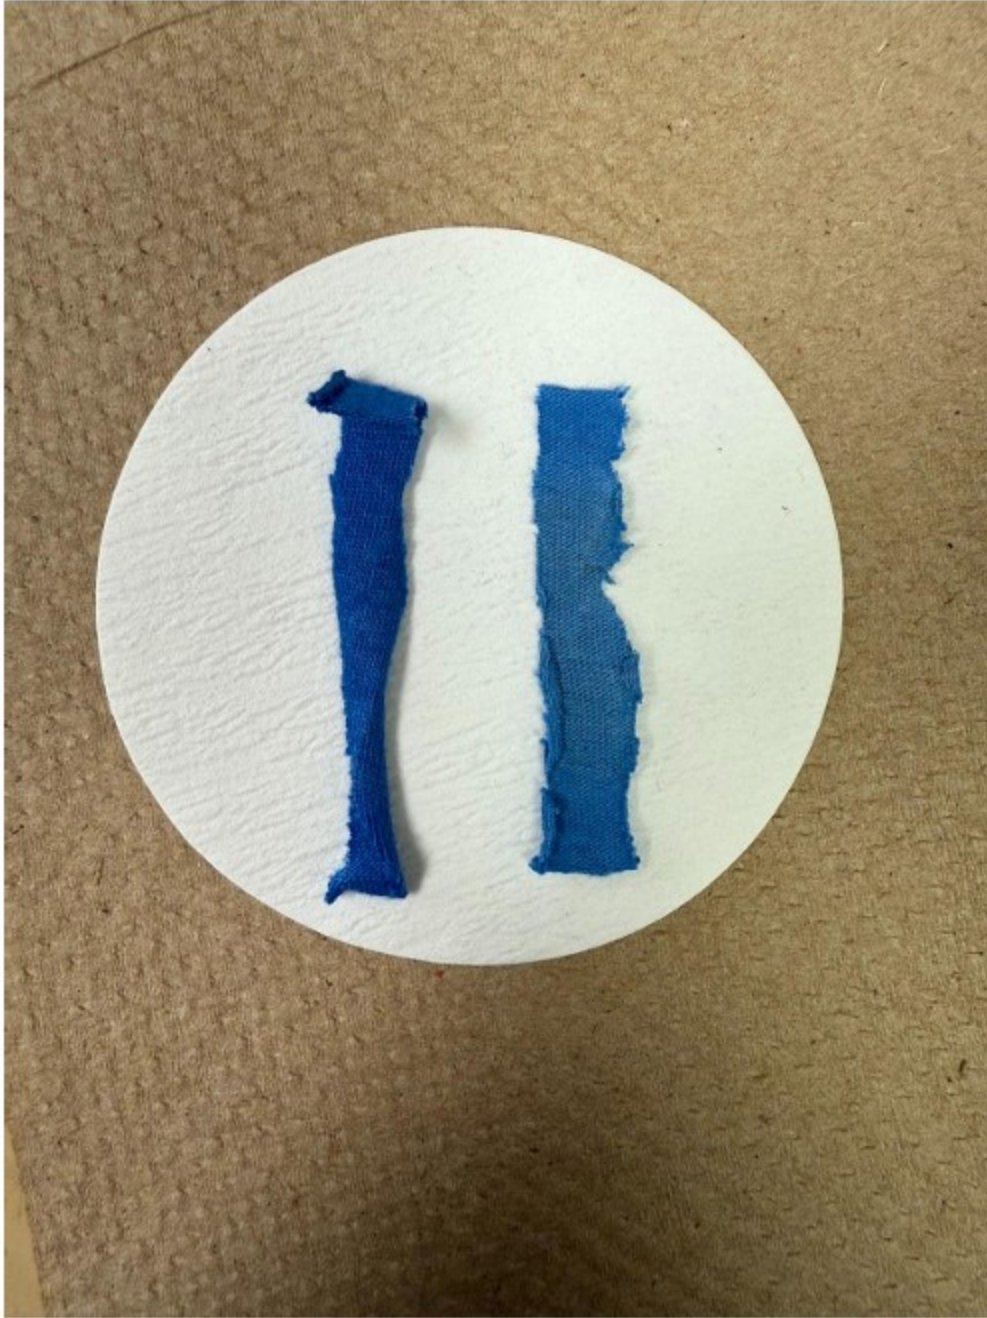

Figure S9. Blue-colored fabric at week 0 (left) and week 14 (right) after exposure to lake water.

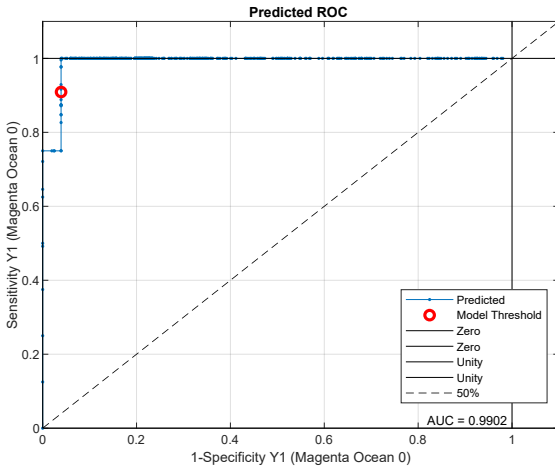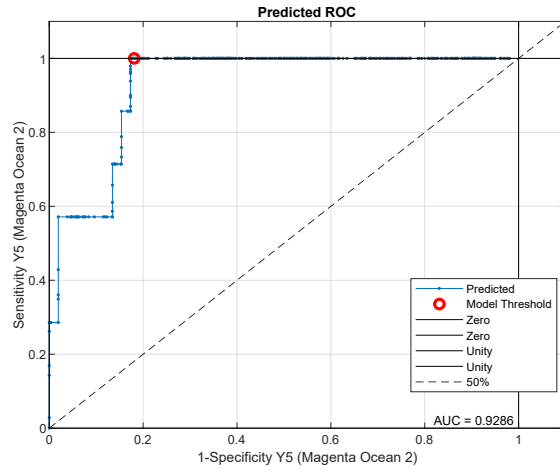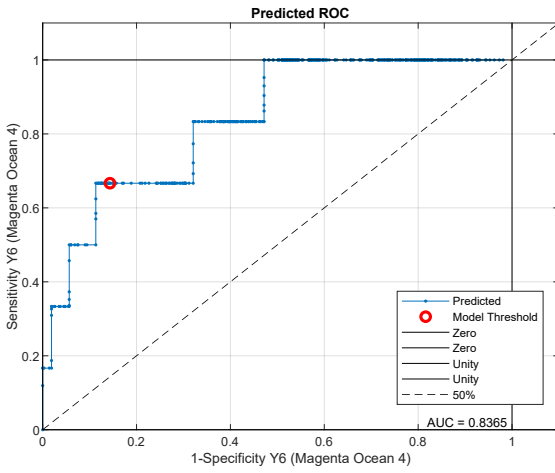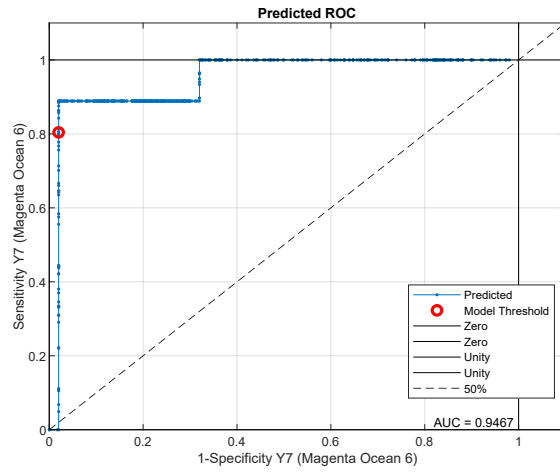

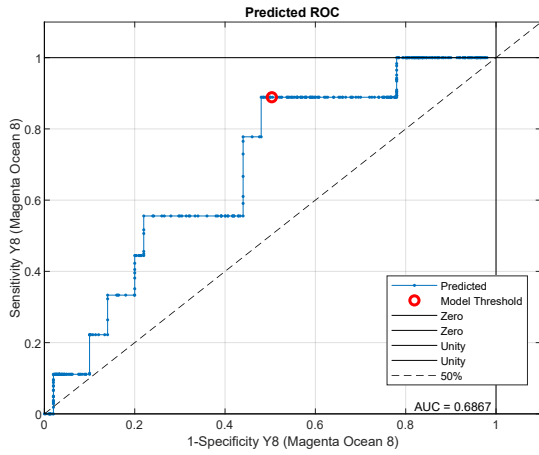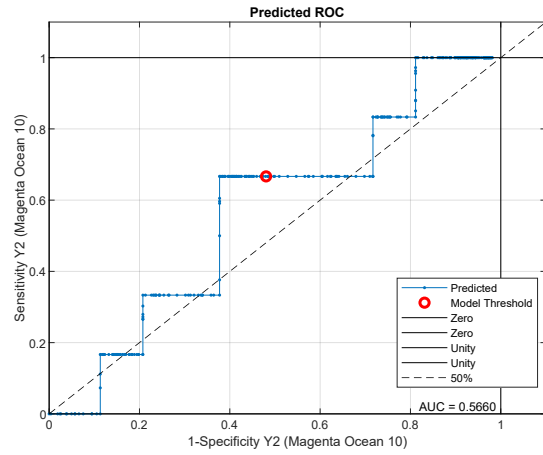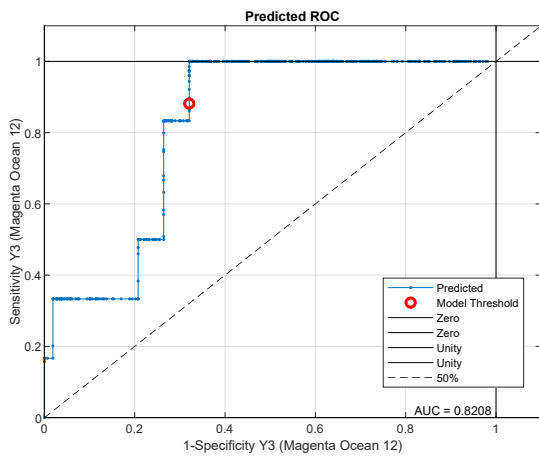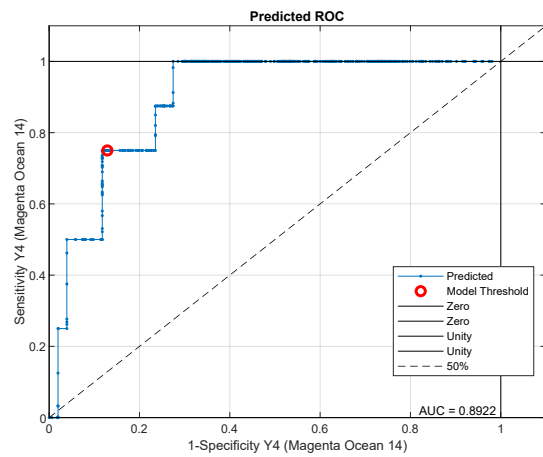

**Figure S10.** ROC plots for PLS-DA model used to predict faring stages of magenta-colored cotton exposed to ocean water (Figure 3, A).

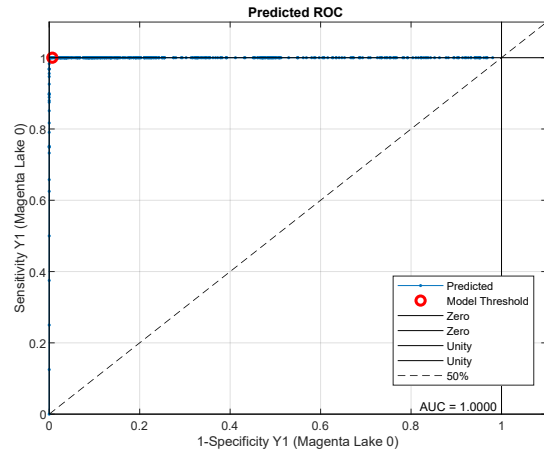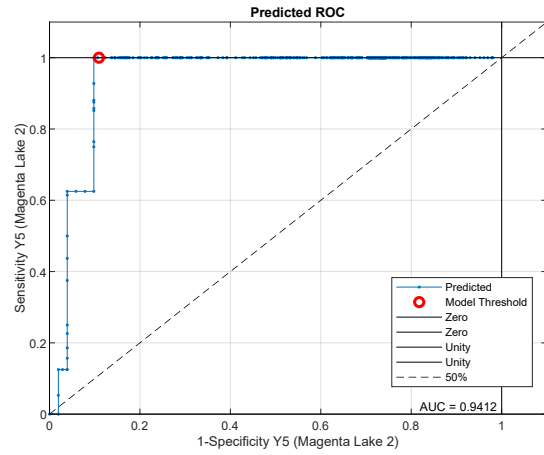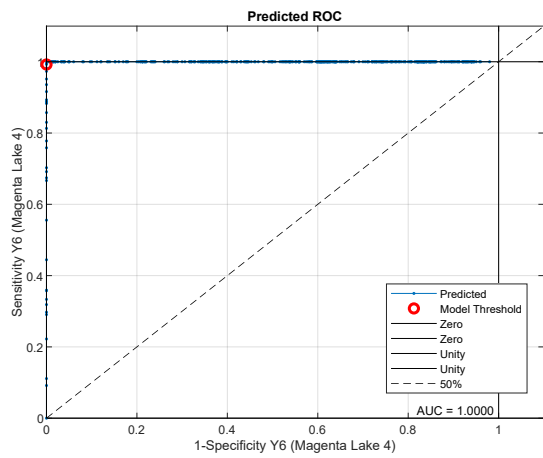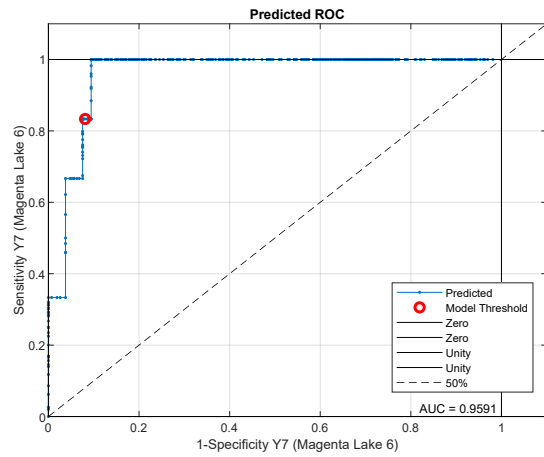

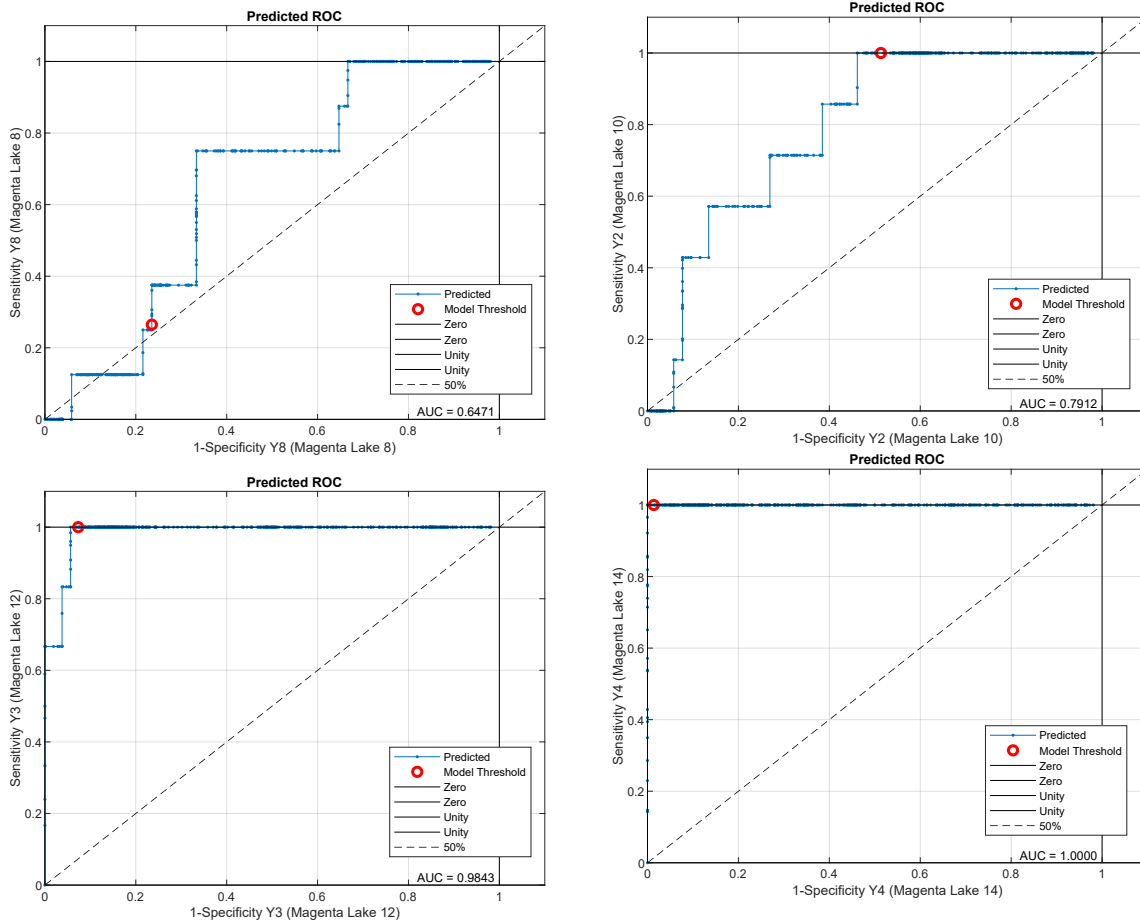

**Figure S11.** ROC plots for PLS-DA model used to predict faring stages of magenta-colored cotton exposed to lake water (Figure 3, A).

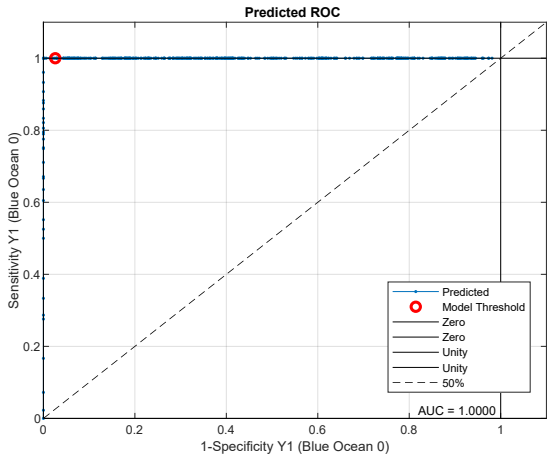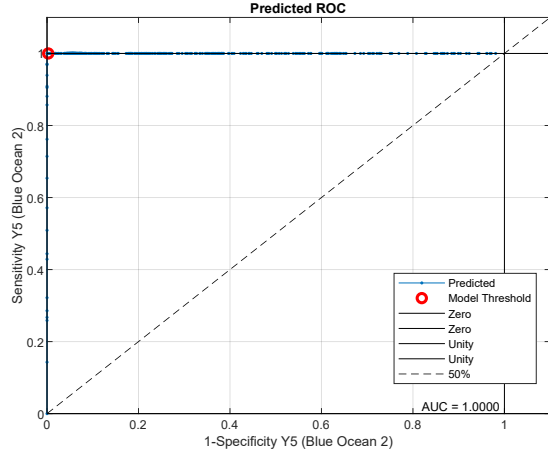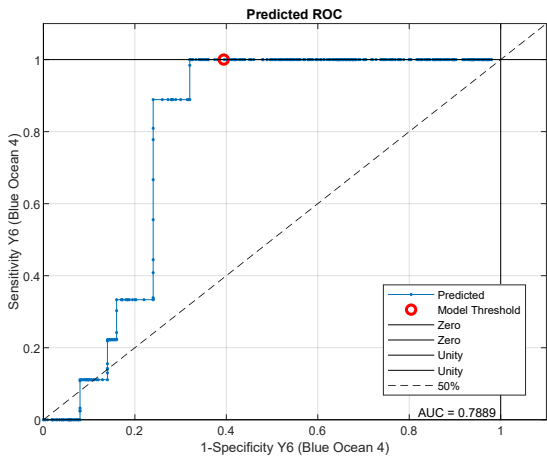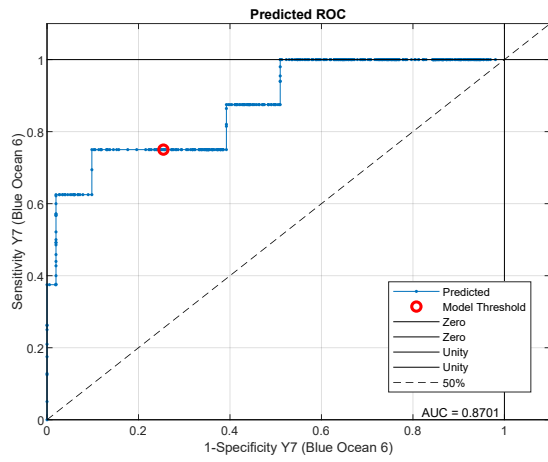

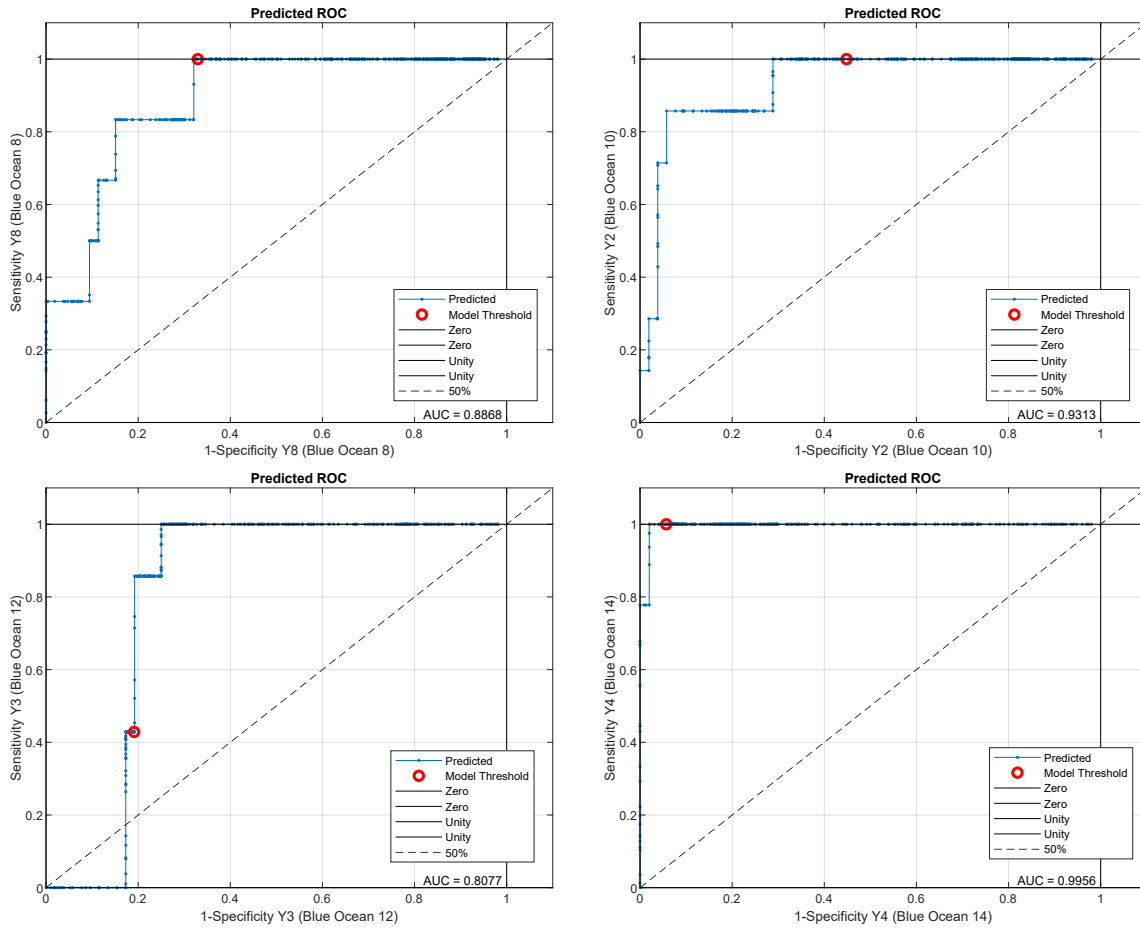

**Figure S12.** ROC plots for PLS-DA model used to predict faring stages of blue-colored cotton exposed to ocean water (Figure 5, A).

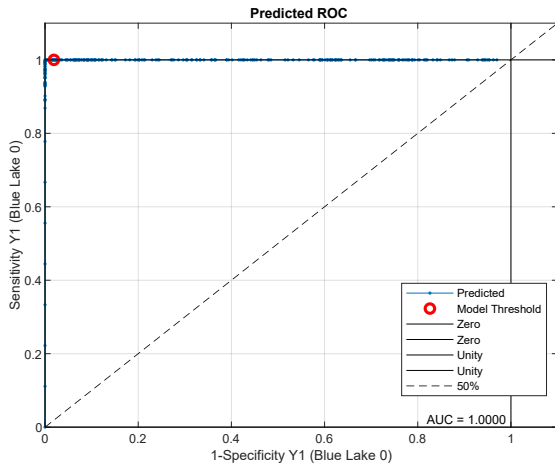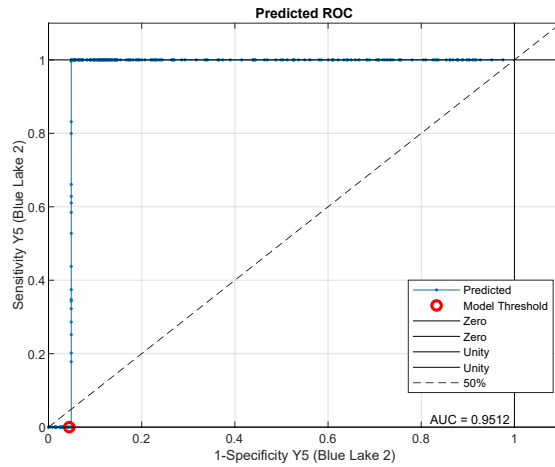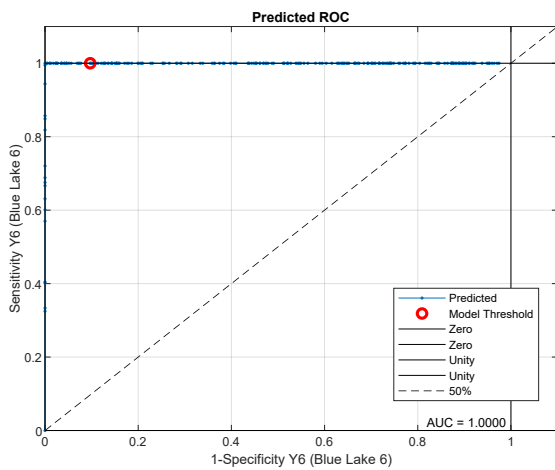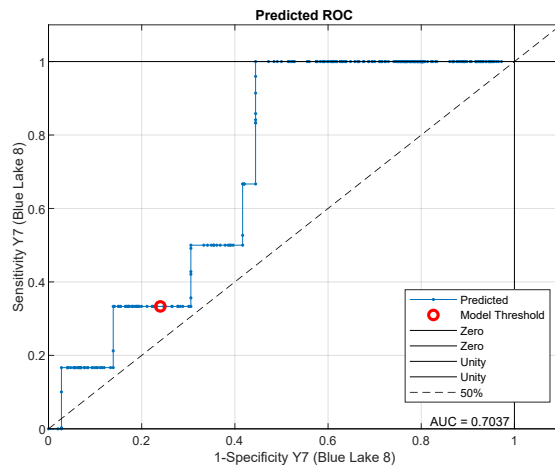

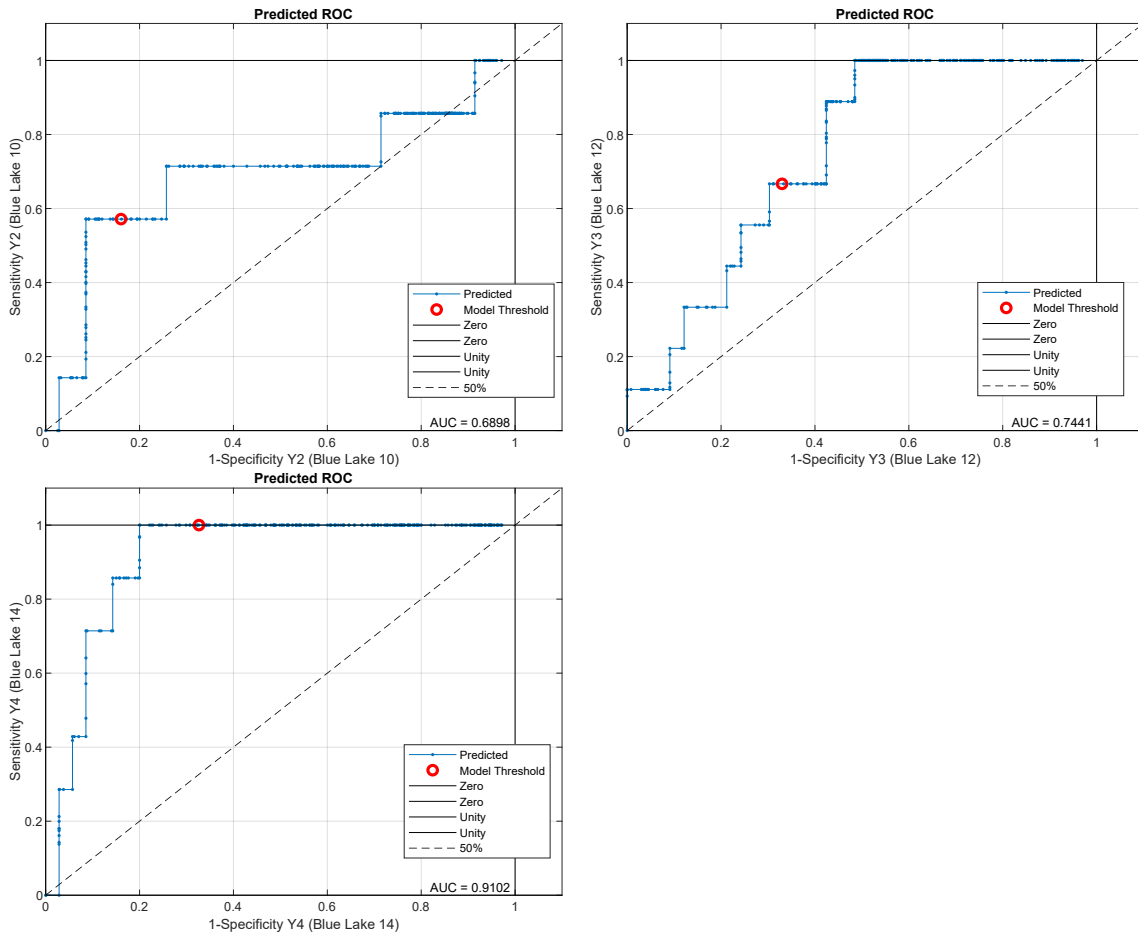

**Figure S13.** ROC plots for PLS-DA model used to predict faring stages of blue-colored cotton exposed to lake water (Figure 5, A).

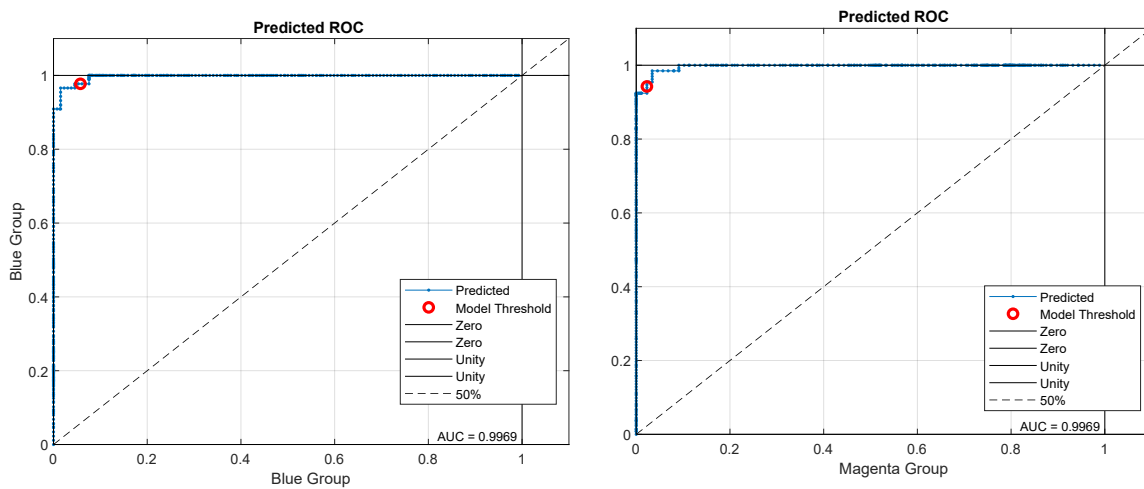

**Figure S14.** ROC plots for PLS-DA model used to predict faring stages of blue-colored cotton exposed to ocean and lake water (Table 2).

# Magenta Ocean

Statistics for each y-block column:  
 Modeled Class: 1 2 3 4 5 6 7 8  
 Sensitivity (Cal): 1.000 0.920 0.920 0.920 1.000 0.960 0.720 0.920  
 Specificity (Cal): 0.971 0.379 0.707 0.828 0.839 0.782 0.925 0.305  
 Sensitivity (CV): 1.000 0.760 0.840 0.920 0.920 0.880 0.640 0.840  
 Specificity (CV): 0.971 0.431 0.713 0.822 0.839 0.776 0.914 0.305  
 Class. Err (Cal): 0.0142857 0.350345 0.186552 0.126207 0.0804598 0.129195 0.177356 0.387701  
 Class. Err (CV): 0.0142857 0.404483 0.223678 0.12908 0.12046 0.172069 0.223103 0.427701  
 RMSEC: 0.195708 0.32873 0.305846 0.290856 0.302851 0.301699 0.270861 0.328642  
 RMSECV: 0.200368 0.330892 0.310557 0.297958 0.304747 0.305894 0.28296 0.330443  
 Bias: 0.00139602 -0.00211777 0.000903964 0.00393892 0.0017842 -0.000288663 -0.00129316 -0.00432351  
 CV Bias: -0.000588994 -0.00161474 -0.000153678 0.00416464 0.00336524 0.00211714 -0.00314917 -0.00414044  
 R^2 Cal: 0.638881 0.0162684 0.148433 0.229994 0.16505 0.171364 0.332116 0.0169227  
 R^2 CV: 0.622237 0.00545213 0.123259 0.194702 0.154755 0.148564 0.273923 0.00787354

Key:  
 mag o\*1 = mag ocean 0  
 mag o\*2 = mag ocean 10  
 mag o\*3 = mag ocean 12  
 mag o\*4 = mag ocean 14  
 mag o\*5 = mag ocean 2  
 mag o\*6 = mag ocean 4  
 mag o\*7 = mag ocean 6  
 mag o\*8 = mag ocean 8

# Magenta Lake

Statistics for each y-block column:  
 Modeled Class: 1 2 3 4 5 6 7 8  
 Sensitivity (Cal): 1.000 0.960 1.000 1.000 0.960 1.000 0.958 1.000  
 Specificity (Cal): 1.000 0.491 0.838 0.855 0.751 0.613 0.764 0.480  
 Sensitivity (CV): 0.958 0.960 1.000 1.000 0.960 1.000 0.917 0.920  
 Specificity (CV): 1.000 0.497 0.838 0.850 0.757 0.613 0.787 0.445  
 Class. Err (Cal): 0 0.274335 0.0809249 0.0722543 0.144277 0.193642 0.138649 0.260116  
 Class. Err (CV): 0.0208333 0.271445 0.0809249 0.0751445 0.141387 0.193642 0.147989 0.317457  
 RMSEC: 0.15953 0.321001 0.274437 0.267586 0.306687 0.316642 0.292955 0.324222  
 RMSECV: 0.162275 0.321889 0.278007 0.269458 0.307014 0.317569 0.294298 0.325489  
 Bias: 0 0 0 0 0 0 0 0  
 CV Bias: -0.00122963 0.000617691 -0.000705469 -0.000730119 0.000545723 0.000778805 0.000257905 0.000465093  
 R^2 Cal: 0.761079 0.0659765 0.3173 0.350958 0.14742 0.091174 0.194303 0.0471412  
 R^2 CV: 0.752808 0.0608168 0.299451 0.341869 0.145628 0.0858487 0.186937 0.0399882

mag lake 0  
 mag lake 10  
 mag lake 12  
 mag lake 14  
 mag lake 2  
 mag lake 4  
 mag lake 6  
 mag lake 8

# Blue Ocean

Statistics for each y-block column:  
 Modeled Class: 1 2 3 4 5 6 7 8  
 Sensitivity (Cal): 1.000 0.920 0.920 1.000 1.000 0.960 1.000 0.920  
 Specificity (Cal): 1.000 0.920 0.800 0.949 0.994 0.794 0.903 0.857  
 Sensitivity (CV): 0.960 0.840 0.840 0.920 1.000 0.960 0.960 0.880  
 Specificity (CV): 1.000 0.931 0.829 0.937 0.977 0.760 0.914 0.874  
 Class. Err (Cal): 0 0.08 0.14 0.0257143 0.00285714 0.122857 0.0485714 0.111429  
 Class. Err (CV): 0.02 0.114286 0.165714 0.0714286 0.0114286 0.14 0.0628571 0.122857  
 RMSEC: 0.224482 0.258479 0.285814 0.203819 0.129599 0.314181 0.280101 0.262073  
 RMSECV: 0.230464 0.279739 0.304798 0.237199 0.147488 0.316755 0.289052 0.27459  
 Bias: 0.000938531 0.00269348 -0.000180958 -0.00950192 -0.00301156 0.000269148 0.0076495 0.00114377  
 CV Bias: 0.00170313 0.0123003 0.00418162 -0.0126185 -0.00851548 0.00209743 0.00286431 -0.00201284  
 R^2 Cal: 0.539281 0.389217 0.253121 0.621013 0.846521 0.0975094 0.283218 0.372062  
 R^2 CV: 0.514439 0.293084 0.165281 0.487362 0.807615 0.0833102 0.237898 0.311438

Key:  
 blue \*1 = blue ocean 0  
 blue \*2 = blue ocean 10  
 blue \*3 = blue ocean 12  
 blue \*4 = blue ocean 14  
 blue \*5 = blue ocean 2  
 blue \*6 = blue ocean 4  
 blue \*7 = blue ocean 6  
 blue \*8 = blue ocean 8

# Blue Lake

Statistics for each y-block column:  
 Modeled Class: 1 2 3 4 5 6 7  
 Sensitivity (Cal): 1.000 0.750 0.958 0.958 1.000 1.000 0.000  
 Specificity (Cal): 1.000 0.496 0.717 0.743 0.985 0.911 0.973  
 Sensitivity (CV): 1.000 0.792 0.958 0.958 0.667 1.000 0.080  
 Specificity (CV): 1.000 0.478 0.726 0.735 0.978 0.935 0.946  
 Class. Err (Cal): 0 0.377212 0.162426 0.149152 0.00746269 0.0443548 0.513393  
 Class. Err (CV): 0 0.365229 0.158001 0.153577 0.177861 0.0322581 0.486786  
 RMSEC: 0.143474 0.379268 0.332936 0.337316 0.102933 0.234915 0.347794  
 RMSECV: 0.149066 0.382102 0.338513 0.3423 0.121271 0.247518 0.363809  
 Bias: 0.00250803 0.0124428 -0.00426954 -0.0147492 -0.00662865 0.0145327 -0.003883616  
 CV Bias: 0.00589129 0.0134488 -0.00388278 -0.0172416 -0.0109332 0.0101845 0.00253293  
 R^2 Cal: 0.857582 0.00589988 0.232989 0.214063 0.507377 0.359937 0.189273  
 R^2 CV: 0.846459 0.00131968 0.207074 0.191264 0.323459 0.288487 0.122221

Key:  
 blue \*1 = blue lake 0  
 blue \*2 = blue lake 10  
 blue \*3 = blue lake 12  
 blue \*4 = blue lake 14  
 blue \*5 = blue lake 2  
 blue \*6 = blue lake 6  
 blue \*7 = blue lake 8

Figure S15. CV classification error and RMSE values for each model.

Table S1. P-values for ANOVA of magenta-colored fabric exposed to ocean water.

| Comparison | p       |
|------------|---------|
| 0-10       | < 0.001 |

|       |         |
|-------|---------|
| 0-12  | < 0.001 |
| 0-14  | < 0.001 |
| 0-4   | 0.006   |
| 0-6   | < 0.001 |
| 0-8   | < 0.001 |
| 10-12 | 0.005   |
| 10-14 | < 0.001 |
| 10-2  | < 0.001 |
| 12-2  | < 0.001 |
| 12-4  | < 0.001 |
| 12-8  | 0.049   |
| 14-2  | < 0.001 |
| 14-4  | < 0.001 |
| 14-8  | 0.012   |
| 2-4   | 0.034   |
| 2-6   | < 0.001 |
| 2-8   | < 0.001 |
| 4-6   | 0.002   |
| 4-8   | .013    |

**Table S2.** P-values for ANOVA of magenta-colored fabric exposed to lake water.

| Comparison | p       |
|------------|---------|
| 0-10       | < 0.001 |
| 0-12       | < 0.001 |
| 0-14       | < 0.001 |
| 0-4        | 0.015   |
| 0-6        | < 0.001 |
| 0-8        | < 0.001 |
| 10-12      | < 0.001 |
| 10-14      | < 0.001 |
| 10-2       | 0.012   |
| 10-6       | 0.042   |
| 10-8       | 0.007   |
| 12-2       | < 0.001 |
| 12-4       | < 0.001 |
| 12-6       | 0.006   |
| 12-8       | 0.030   |
| 14-2       | < 0.001 |

|      |         |
|------|---------|
| 14-4 | < 0.001 |
| 14-6 | < 0.001 |
| 14-8 | < 0.001 |
| 2-6  | < 0.001 |
| 2-8  | < 0.001 |
| 4-6  | 0.001   |
| 4-8  | < 0.001 |

**Table S3.** P-values for ANOVA of blue-colored fabric exposed to ocean water.

| Comparison | p       |
|------------|---------|
| 0-10       | < 0.001 |
| 0-12       | < 0.001 |
| 0-14       | < 0.001 |
| 0-2        | 0.004   |
| 0-4        | 0.003   |
| 0-6        | < 0.001 |
| 0-8        | < 0.001 |
| 10-12      | < 0.001 |
| 10-14      | < 0.001 |
| 10-2       | 0.024   |
| 10-4       | 0.031   |
| 10-8       | 0.008   |
| 12-2       | < 0.001 |
| 12-4       | < 0.001 |
| 12-6       | < 0.001 |

|      |         |
|------|---------|
| 14-2 | < 0.001 |
| 14-4 | < 0.001 |
| 14-6 | < 0.001 |
| 14-8 | 0.013   |
| 2-8  | < 0.001 |
| 4-8  | < 0.001 |
| 6-8  | < 0.001 |

**Table S4.** P-values for ANOVA of blue-colored fabric exposed to lake water.

| Comparison | p       |
|------------|---------|
| 0-10       | 0.006   |
| 0-12       | < 0.001 |
| 0-14       | < 0.001 |
| 0-2        | < 0.001 |
| 0-6        | 0.007   |
| 0-8        | < 0.001 |
| 10-12      | < 0.001 |
| 10-14      | < 0.001 |

|      |         |
|------|---------|
| 10-2 | 0.015   |
| 10-8 | 0.006   |
| 12-6 | < 0.001 |
| 12-8 | 0.002   |
| 14-6 | < 0.001 |
| 14-8 | 0.002   |
| 2-6  | 0.034   |
